# Supplementary material for: Renal nerve stimulation modulates renal blood flow in a frequency-dependent manner
Source: Research Square preprint supplement (doi:10.21203/rs.3.rs-7724105/v1), 2025-10-14
Supplement: Supplementary file 1 [file 4e3d3dfe36c3b8d4851592b7.docx]

**Supplementary Figures**

**
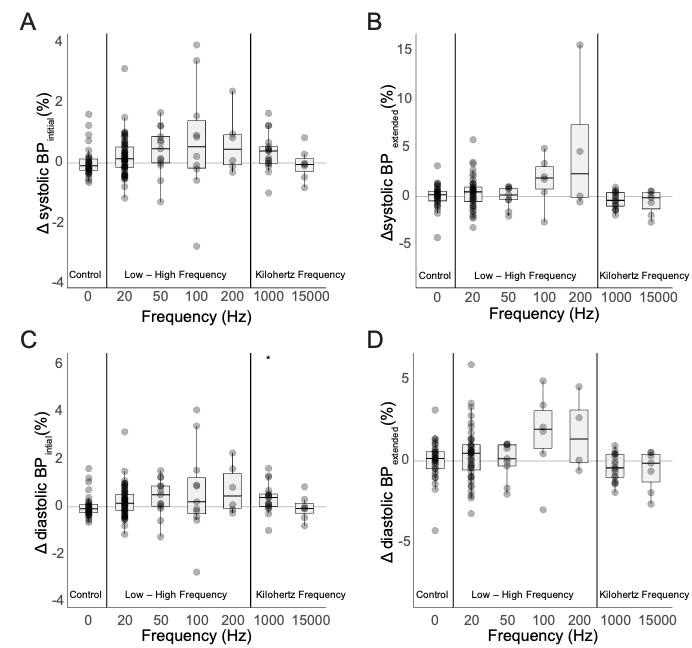
**

**Figure S1. Changes in Blood Pressure during Renal Nerve Stimulation.** Shown are collective data across subjects for changes in systolic blood pressure during the **(A)** initial and **(B)** extended response periods as well as diastolic blood pressure during the **(C)** initial and **(D)** extended response periods.

**
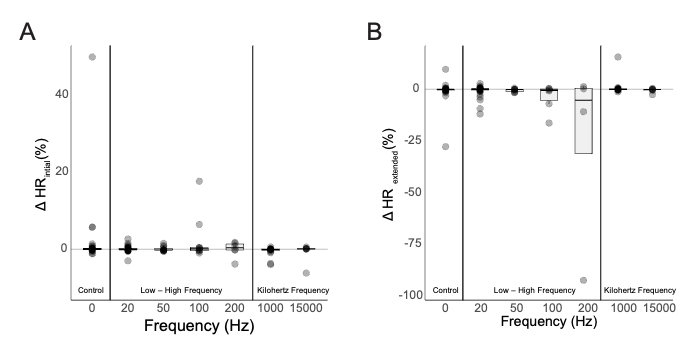
**

**Figure S2. Changes in Heart Rate during Renal Nerve Stimulation.** Shown are collective data across subjects for changes heart rate during the **(A)** initial and **(B)** extended response periods.

**
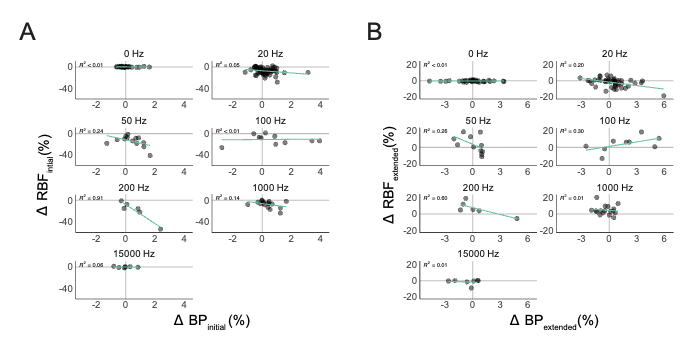
**

**Figure S3. Relationships between Systemic Blood Pressure and Renal Blood Flow Changes.** Shown are collective data across subjects for **(A)** initial and **(B)** extended response periods.
